# Supplementary figures and images for: Novel role of pancreatic differentiation 2 in facilitating self-renewal and drug resistance of pancreatic cancer stem cells
Source: PubMed Central journal article supplement — Br J Cancer. 2014 Jul 8;111(3):486–96. doi: 10.1038/bjc.2014.152 (PMC4119968; doi:10.1038/bjc.2014.152), 2014-07-08

# Supplementary Figure 1

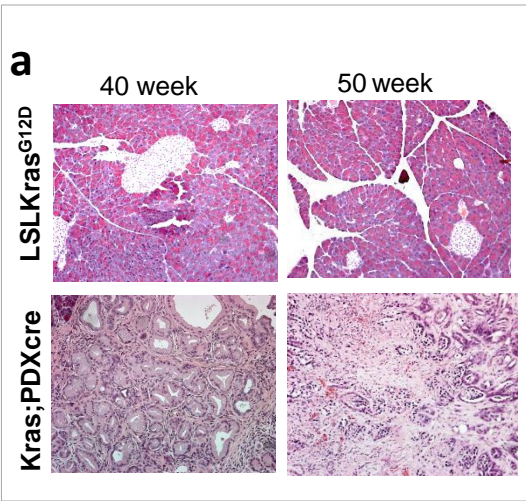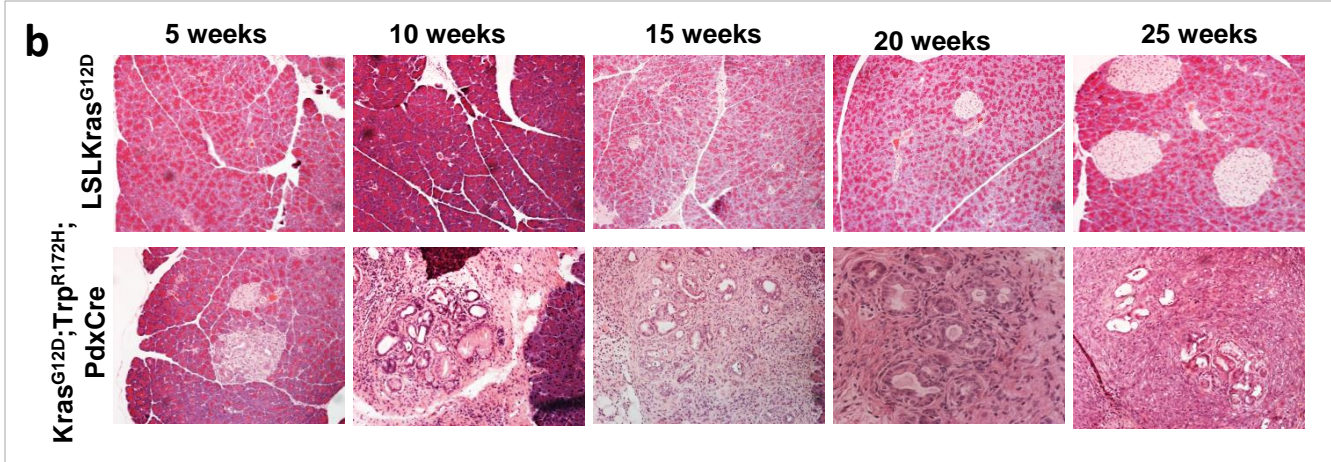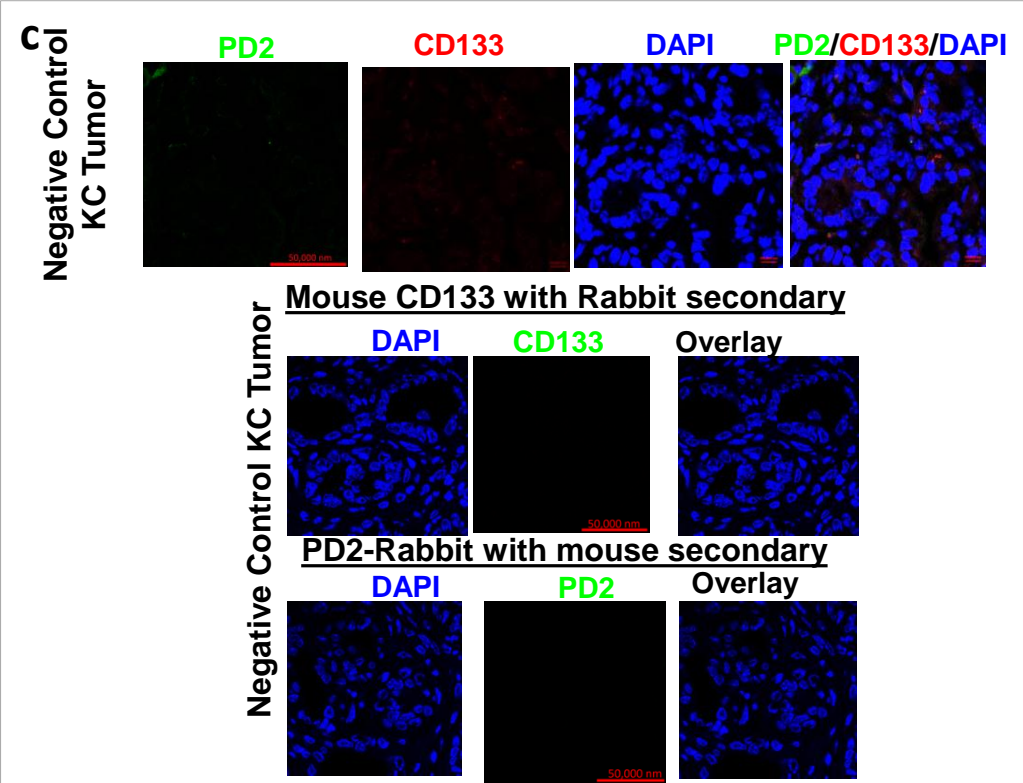

Supplement: bjc2014152x1.pdf [file bjc2014152x1.pdf]

**BXPC3**

**MiaPaca**

**SW1990**

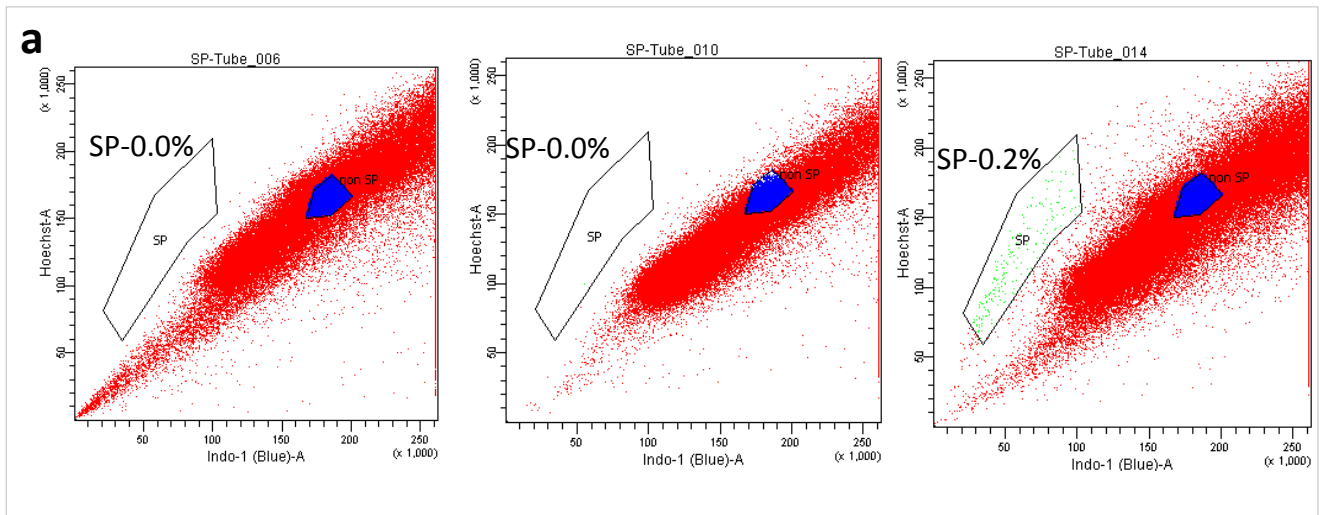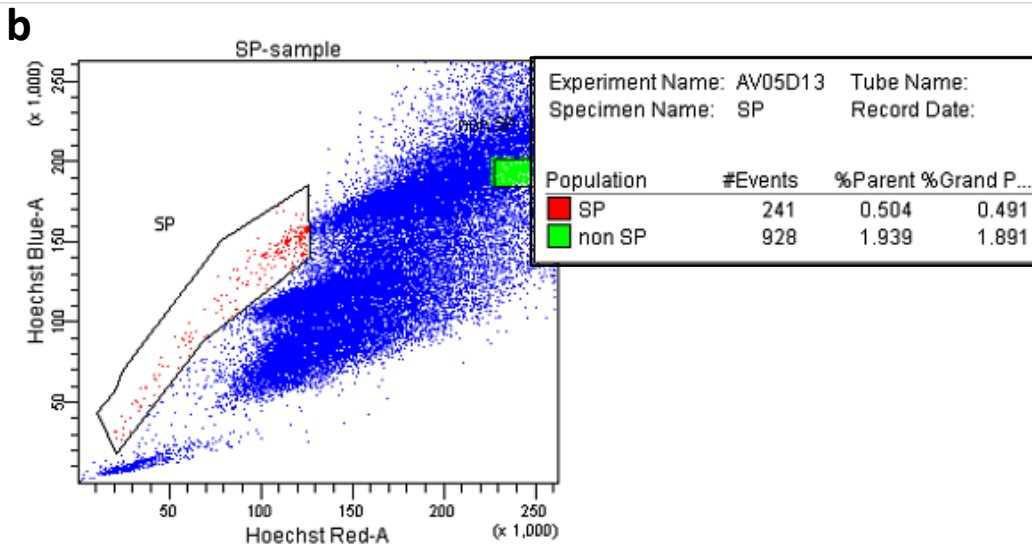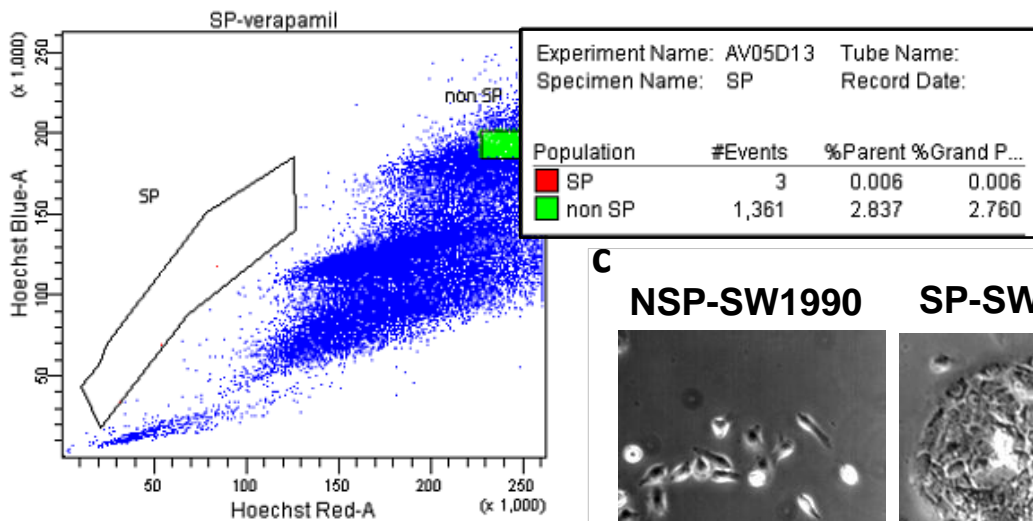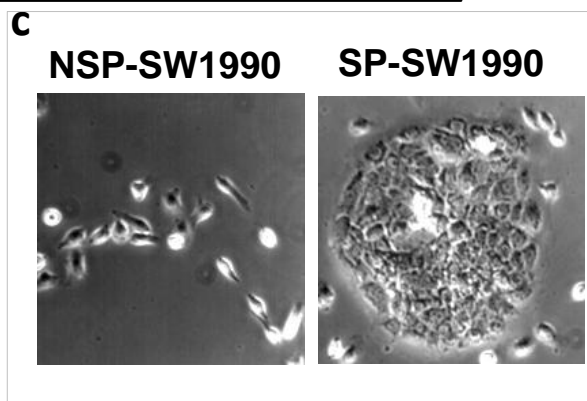

Supplement: bjc2014152x2.pdf [file bjc2014152x2.pdf]
